# Supplementary material
Source: HighWire-hosted journal article supplement (https://bmjopen.bmj.com/content/10/9/e034455)
Supplement: inline-supplementary-material-3 [file inline-supplementary-material-3.pdf]

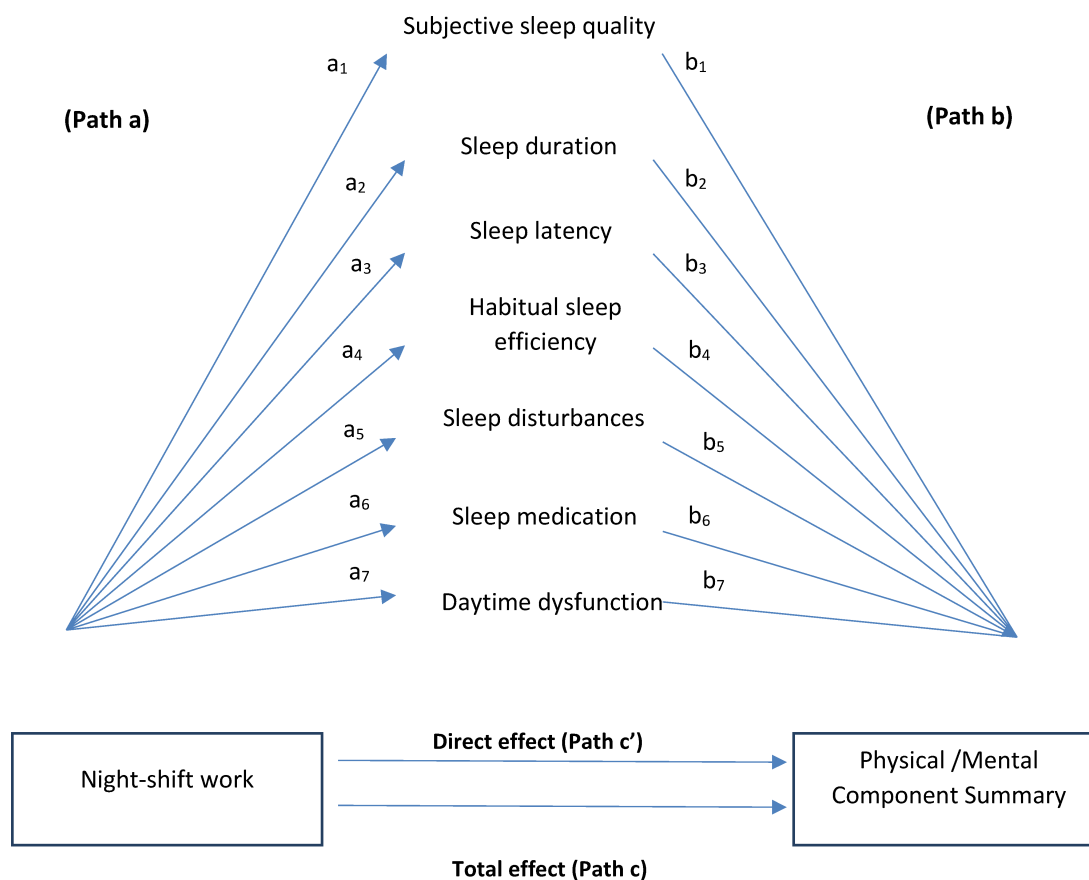

**e-Figure 3. Indirect effect model between night-shift work and HRQoL (SF-12 PCS or SF-12 MCS) mediated by individual components of the PSQI**

Path  $a_1$  to  $a_7$ : night-shift work to each of the seven potential mediators

Path  $b_1$  to  $b_7$ : each of the 7 potential mediators to SF-12 PCS or SF-12 MCS, while adjusting for the effect of night-shift work

Path c: night-shift work to SF-12 PCS or SF-12 MCS

Path c': night-shift work to SF-12 PCS or SF-12 MCS, while adjusting for the effect of the potential mediators.

Abbreviation: PSQI, Pittsburgh Sleep Quality Index; QoL, Quality of Life; PCS, Physical Component Summary; MCS, Mental Component Summary
